# Supplementary material for: New strategy for overcoming microleakage: an elastic layer for dental caries restoration
Source: Royal Society of Chemistry journal article supplement (doi:10.1039/c5tb00432b), 2015-01-01
Supplement: c5tb00432b1.pdf [file c5tb00432b1.pdf]

## Supplementary Information

### New strategy for overcoming microleakage: An elastic layer for dental caries restoration

Zhang yingchao<sup>a</sup>, Gong haihuan<sup>b</sup>, Feng dan<sup>b</sup>, Fang tengjiaozi<sup>b</sup> Cao danfeng<sup>a</sup>, Zhu song<sup>b\*</sup>, Shi zuosen<sup>a</sup>,  
Cui zhanchen<sup>a\*</sup>

<sup>a</sup> State Key Laboratory of Supramolecular Structure and Materials, College of Chemistry, Jilin University, Changchun 130012, PR China

<sup>b</sup> Department of Prosthetic Dentistry, Hospital of Stomatology, Jilin University, Changchun 130021, PR China

\* Corresponding author to: Song Zhu.

E-mail: [zhusong1965@163.com](mailto:zhusong1965@163.com) Tel. : +86-431-88796055 Fax : +86-431-88975348

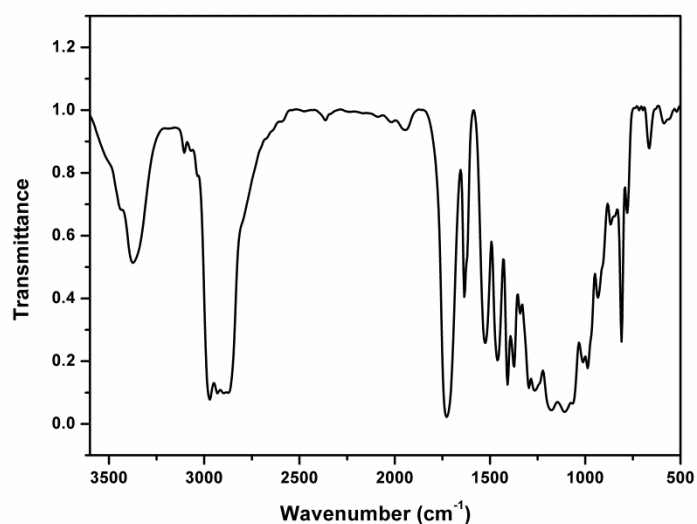

Figure S1 IR-spectroscopy of the polyurethane dimethacrylate oligomer

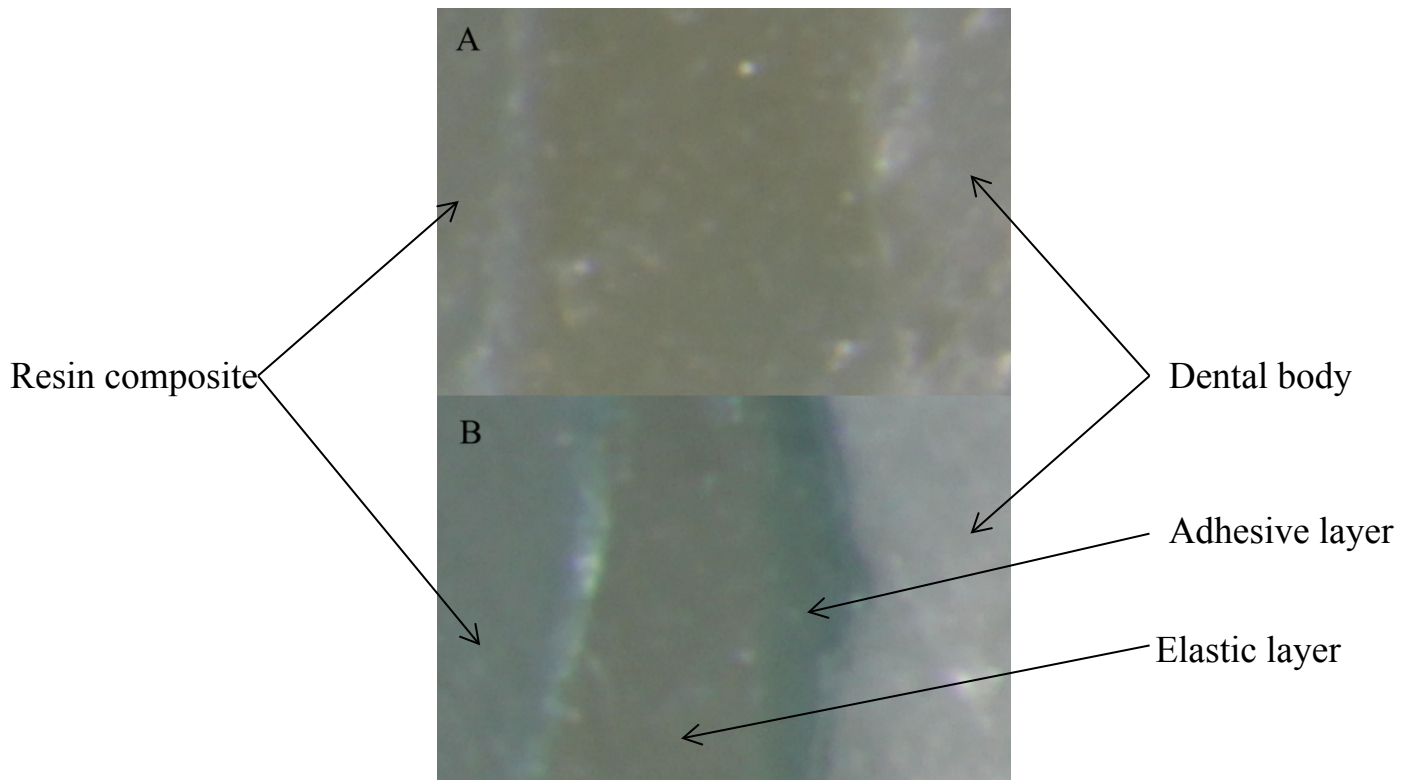

Figure S2 A the adhesive layer and elastic layer are not clear; B the adhesive layer and elastic layer are easy to be distinguished when microleakage occurred.
